# Supplementary material for: The golgin Lava lamp mediates dynein-based Golgi movements during Drosophila cellularization
Source: Springer Nature journal article supplement (doi:10.1038/ncb1264), 2005-05-22
Supplement: ncb1264-s5.pdf [file ncb1264-s5.pdf]

---

Supplementary Information Videos **The MT motility factor-binding domains of Lva disrupt Golgi movement and furrow formation in live embryo injection assays.** Live MyoII-GFP embryos containing fluorescently-labeled Golgi bodies were injected with GST (Movie 1), GST-Lva1 (Movie 2), GST-Lva3 (Movie 3), or GST-Lva5 (Movie 4) protein at the beginning of mitotic cycle 14 and time-lapse microscopy recordings were started immediately. The embryo in each movie corresponds to that shown in Fig. 4, except that each movie shows the dorsal and ventral surfaces along the midsection of the embryos.
